# Supplementary material for: Acceptability of COVID-19 Vaccination among Healthcare Workers in Sudan: A Cross Sectional Survey
Source: Research Square preprint supplement (doi:10.21203/rs.3.rs-745232/v1), 2021-07-26
Supplement: Supplementary file 1 [file 4392f21bbd27ccff2cc0aaa5.docx]

Table S1: Health Believe Model By gender

|  |  | Male | Female |  |  |
| --- | --- | --- | --- | --- | --- |
| Do you think (Concerned) you are at risk of getting COVID-19? | Yes | 197 | 187 | 2.447 | 0.125 |
| 51.30% | 48.70% |
| No | 14 | 23 |
| 37.80% | 62.20% |
| If you think (Concerned) that you are at risk of getting COVID-19, Choose what represents your Concern? | I am concerned that I will get mild symptoms which will probably not require hospitalization | 112 | 95 | 3.007 | 0.395 |
| 54.10% | 45.90% |
| I am concerned that I will get moderate symptoms which probably need hospitalization | 37 | 41 |
| 47.40% | 52.60% |
| Concerned that I will get severe symptom which will probably require admission to the Intensive care unit | 18 | 25 |
| Not Concerned | 41.90% | 58.10% |
| 44 | 49 |
| 47.30% | 52.70% |
| I don’t believe vaccine works | Agree | 29 | 22 | 3.032 | 0.216 |
| 56.90% | 43.10% |
| Perceived harm | High | 15 | 23 | 1.893 | 0.178 |
| 39.50% | 60.50% |
| Low | 196 | 187 |
| Perceived barriers | High | 14 | 34 | 9.513 | 0.002 |
| 29.20% | 70.80% |
| Low | 197 | 176 |
| 52.80% | 47.20% |
| I would get the vaccine to prevent COVID-19 in friends and family Members | Yes | 92 | 97 | 0.389 | 0.557 |
| 48.70% | 51.30% |
| No | 119 | 111 |
| 51.70% | 48.30% |
| I would get the vaccine to prevent COVID-19 in community | Yes | 127 | 92 | 10.693 | 0.001 |
| 58.00% | 42.00% |
| No | 84 | 116 |
| 42.00% | 58.00% |

Table S2: Health believe Model for COVID-19 vaccine acceptance

| Health believe Model for vaccine acceptance  N=576 | | Agree  (n %) | Mutual  (n %) | Disagree  (n %) |
| --- | --- | --- | --- | --- |
| Perceived benefit | I don’t believe vaccine works | 68  (9.3%) | 174  (23.9%) | 334  (45.8%) |
| Perceived harm | I don’t believe vaccine is safe | 112  (15.4%) | 175  (24%) | 289  (39.6%) |
| Am worried about side effects of COVID-19 vaccine | 300  (52.1%) | 141  (24.5%) | 135  (23.4%) |
| Am worried about the effect of the vaccine on the pre-existing conditions | 176  (30.6%) | 151  (26.2%) | 249  (43.2%) |
| Perceived barriers | I don’t trust pharmaceutical companies making the vaccine | 146  (25.3%) | 148  (25.7%) | 282  (49%) |
|  | I don’t trust the agents / government overseeing COVID-19 vaccination process | 149  (25.9%) | 134  (23.3%) | 293  (50.9%) |
|  | | | | |
| Perceived susceptibility | Consider Yourself at risk for getting COVID-19 | 531 (92.2%) | | |
| Perceived severity | mild symptoms which will probably not require hospitalization | 292 (50.7%) | | |
| moderate symptoms which probably need hospitalization | 100 (17.4%) | | |
| severe symptom which will probably require admission to the Intensive care unit | 53 (9.2%) | | |
| Not Concerned | 131 (22.7%) | | |
| Cues to action | to prevent COVID-19 in myself | 183 (23.8%) | | |
| to prevent COVID-19 in friends and family Members | 260 (33.8%) | | |
| to prevent COVID-19 in community | 278 (36.2%) | | |
